# Supplementary material
Source: PubMed Central journal article supplement (PMC3077672)

**a**

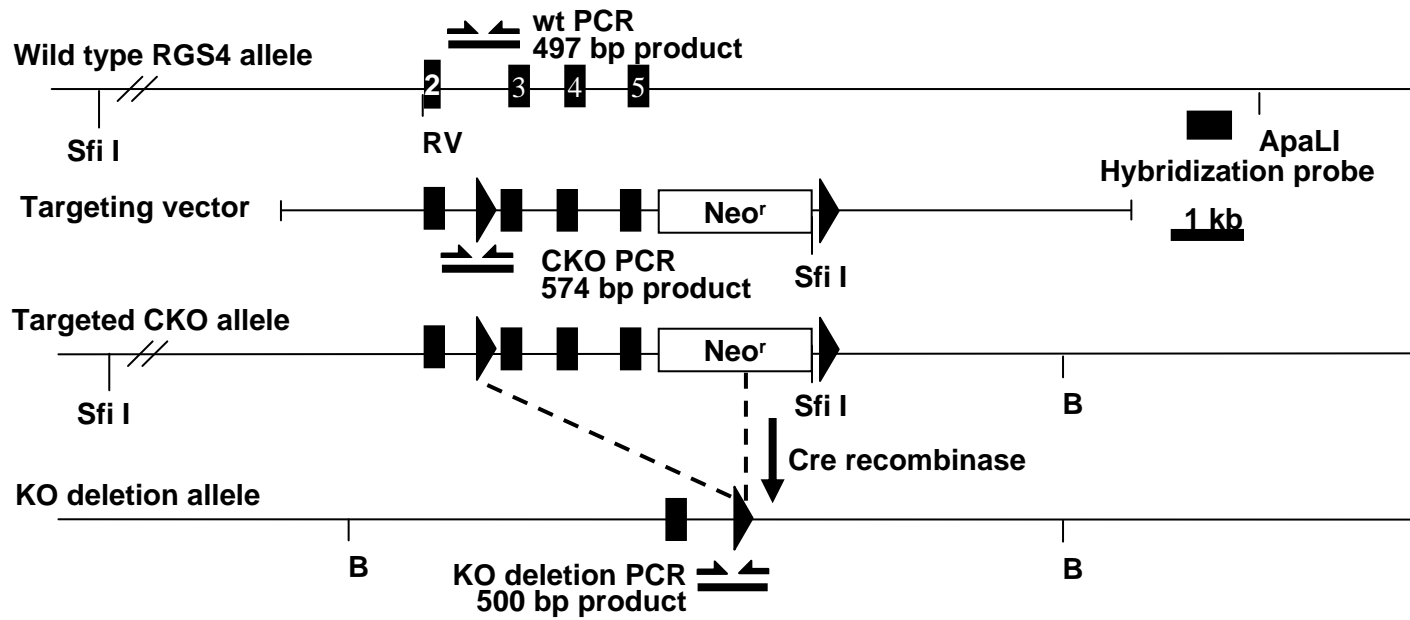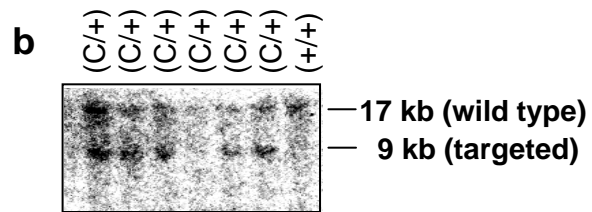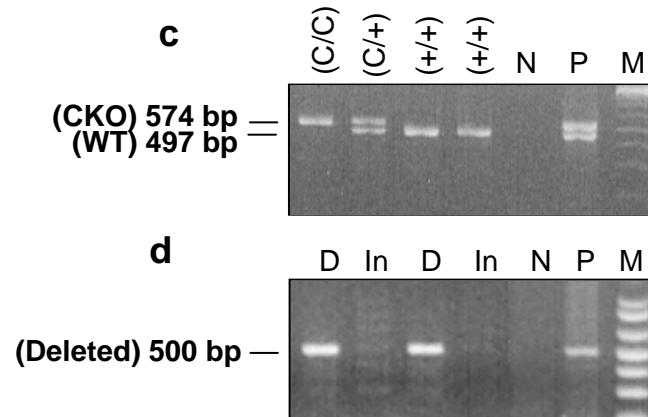

Contextual Fear Conditioning

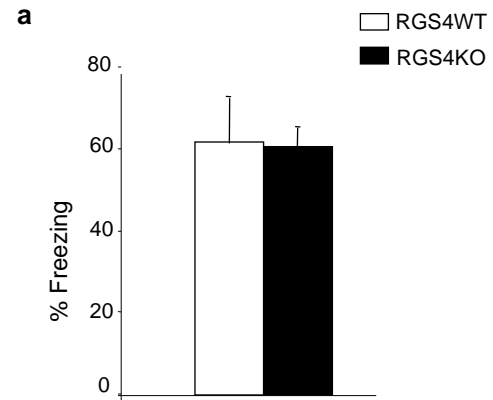

Cued Fear Conditioning

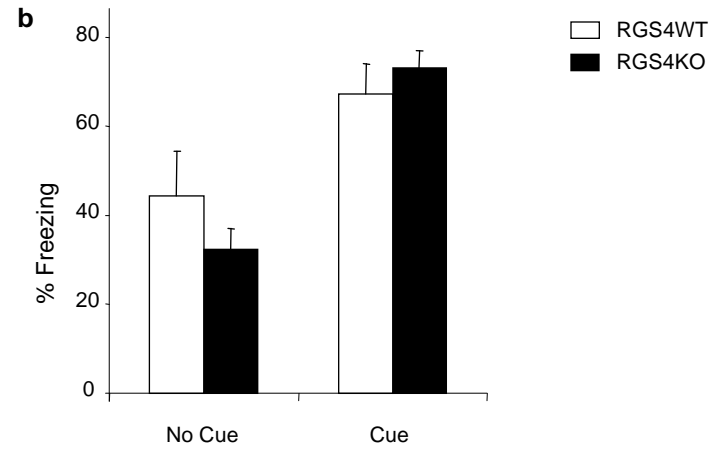

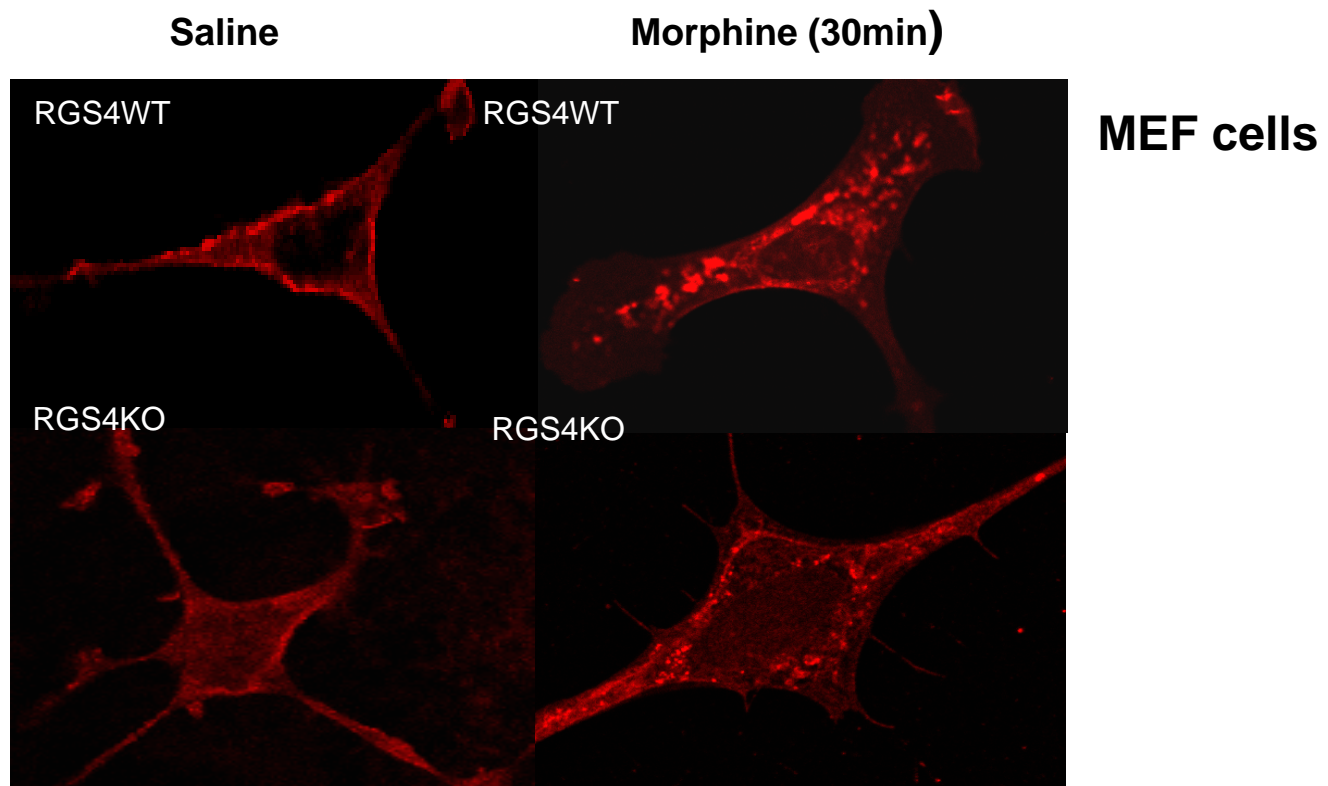

Supplement: NIHMS284174-supplement-Suppl_Figures.pdf [file NIHMS284174-supplement-Suppl_Figures.pdf]
